# Supplementary material
Source: Springer Nature journal article supplement (https://www.springermedizin.de/resource/supplementary/12931_2012_1287_MOESM6_ESM.pdf/9425708)

**A**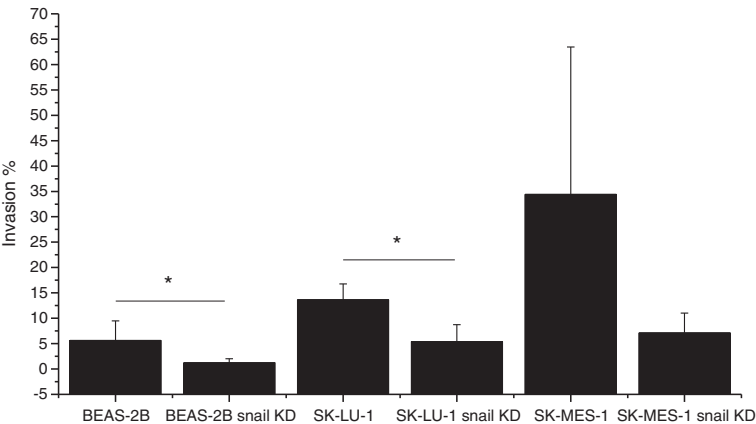**B**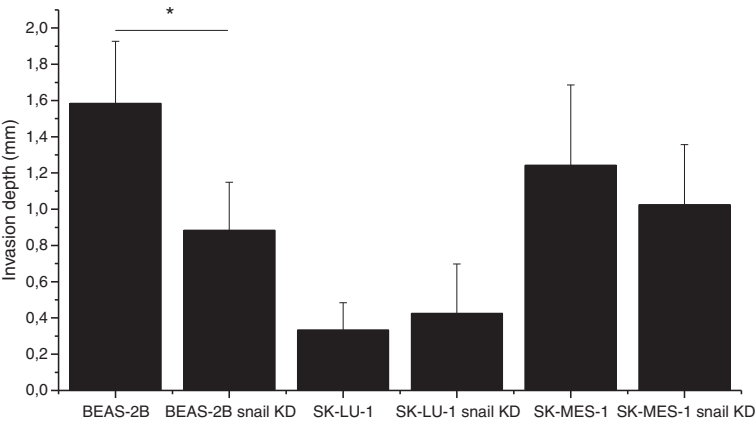

Supplement: MOESM6 [file 9425708]
